# Supplementary material
Source: PubMed Central journal article supplement (PMC5697943)

SUPPLEMENTARY DATA

**Supplementary Table 1. List of oligonucleotide primer pairs used in real time RT-PCR.**

| Gene          | Forward primer       | Reverse primer        | Size (bp) |
|---------------|----------------------|-----------------------|-----------|
| IRAK1         | GCTGTGGACACCGATACCTT | GGTCACTCCAGCCTCTTCAG  | 141       |
| TRAF6         | GATCGGGTTGTGTGTGTCTG | AGACACCCCAGCAGCTAAGA  | 178       |
| ADAMTS3       | AGCAAGTACTGCCTGGGAGA | TGACAGACTCGGGCTTTTCT  | 180       |
| iNOS          | TGGTGGTGACAAGCACATTT | AAGGCCAAACACAGCATAACC | 119       |
| TNF- $\alpha$ | ACGGCATGGATCTCAAAGAC | GTGGGTGAGGAGCACGTAGT  | 116       |
| IL-1 $\beta$  | GGGCCTCAAAGGAAAGAATC | TACCAGTTGGGGA ACTCTGC | 183       |
| YM1           | GAAGGAGCCACTGAGGTCTG | CACGGCACCTCCTAAATTGT  | 141       |

**Supplementary Table 2. List of miRNA primers used in real-time RT-PCR.**

| miRNAs          | Company            | Catalog number      |
|-----------------|--------------------|---------------------|
| mmu-miR-146a-5p | Applied Biosystems | 4427975 (ID#000468) |
| U6 snRNA        | Applied Biosystems | 4427975 (ID#001973) |
| cel-miR-39      | Applied Biosystems | 4427975 (ID#000200) |

**Supplementary Table 3. Antibodies used for Western blotting.**

| Antibody name           | Company and catalog number |
|-------------------------|----------------------------|
| anti- $\beta$ -actin    | Abcam, ab6276              |
| anti-Arginase-1         | Santa Cruz, SC-18351       |
| anti-YM1                | R&D Systems, AF2446        |
| anti-TNF- $\alpha$      | Abbiotec, 250844           |
| anti-iNOS               | EMD Millipore, ABN26       |
| anti-IL-1 $\beta$       | Abcam, ab9787              |
| anti-IRAK1              | Santa Cruz, SC-7883        |
| anti-NF- $\kappa$ B p65 | Abcam, ab7970              |
| anti-TRAF6              | Santa Cruz, SC-7221        |
| anti-ADAMTS3            | Santa Cruz, SC-21486       |
| anti-PGP9.5             | MILLIPORE, NE1013          |

SUPPLEMENTARY DATA

**Supplementary Table 4. Morphomeric changes of myelinated sciatic nerves.**

| Property             | db/m(20w) | db/m(28w) | db/db(20w) | db/db+miR con | db/db+miR-146a |
|----------------------|-----------|-----------|------------|---------------|----------------|
| Axon diameter(μm)    | 5.23±0.26 | 5.18±0.14 | 5.22±0.11  | 4.70±0.08##   | 5.18±0.09**    |
| Fiber diameter(μm)   | 8.60±0.18 | 8.66±0.17 | 7.88±0.11† | 7.54±0.14###  | 8.70±0.16***   |
| myelin thickness(μm) | 1.78±0.07 | 1.74±0.06 | 1.62±0.04† | 1.42±0.03###  | 1.75±0.05***   |
| g ratio              | 0.58±0.01 | 0.59±0.01 | 0.60±0.005 | 0.62±0.005#   | 0.59±0.006**   |

Values are mean±SE.

† P<0.05 vs db/m (20w)

# P<0.05, ## P<0.01, ### P<0.001 vs db/m (28w)

\*\* P<0.01, \*\*\* P<0.001 vs db/db+miR con

**Supplementary Figure 1. Regional blood flow was reduced at different ages of diabetic mice.** Regional blood flow within the sciatic nerve and foot pad tissues was significantly reduced compared with db/m mice aged 20 weeks (A, B). Db/db mice at 28 weeks displayed a significant blood flow deficiency compared with db/db mice aged 20 weeks (A, B). miR-146a treatment significantly increased regional blood flow at the sciatic nerve tissue and foot pads of db/db mice aged 28 weeks compared to the miR-67 mimic treatment (A, B). \* P<0.05 vs db/db + miR con; ## P<0.01 vs db/m.

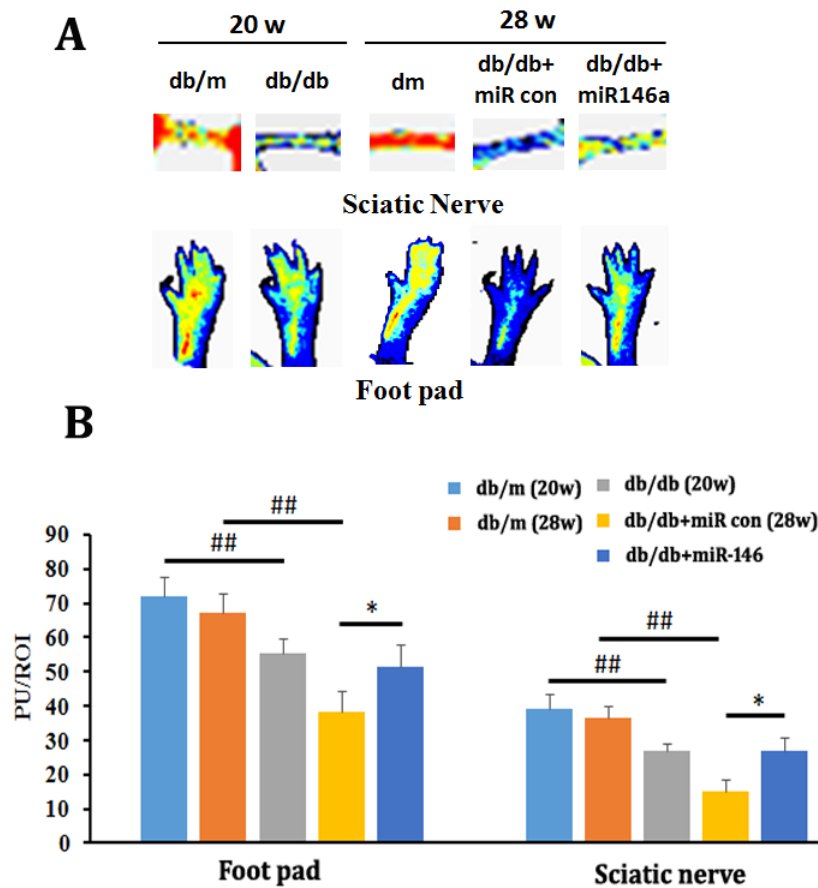

SUPPLEMENTARY DATA

**Supplementary Figure 2. The effect of diabetes on the number of intraepidermal nerve fibers (IENFs).** The amount of IENFs in foot-pads stained by the antibody against PGP9.5 was significantly reduced in db/db mice compared with db/m mice aged 20 weeks. Db/db mice aged 28 weeks treated with cel-miR-67 mimics showed approximately a 50% decrease in the number of IENF, compared to age matched non-diabetic db/m mice. Compared with db/db mice aged 20 weeks, db/db mice at 28 weeks displayed a significant reduction of IENF number. \* P<0.05 vs db/db + miR con; ## P<0.01 vs db/m.

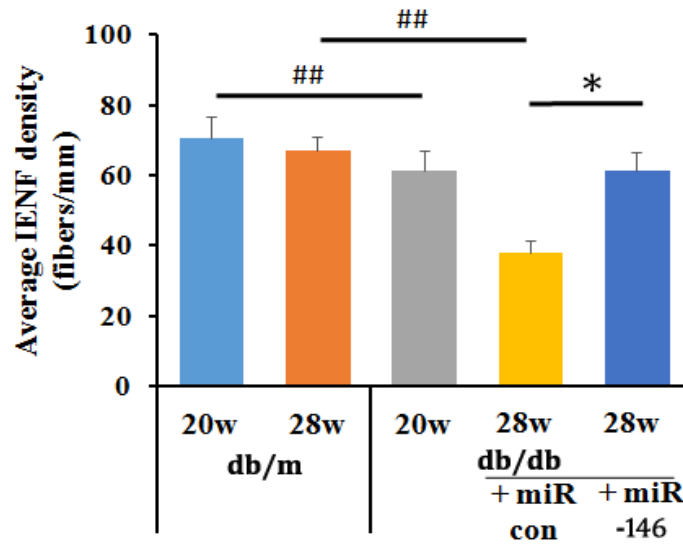

SUPPLEMENTARY DATA

**Supplementary Figure 3. Morphomeric change of myelinated sciatic nerves.** Representative images of semi-thin toluidine blue-stained transverse sections of sciatic nerves derived from non-diabetic (db/m, A) and diabetic mice (db/db, B) aged 20 weeks. Bar=25 $\mu$ m.

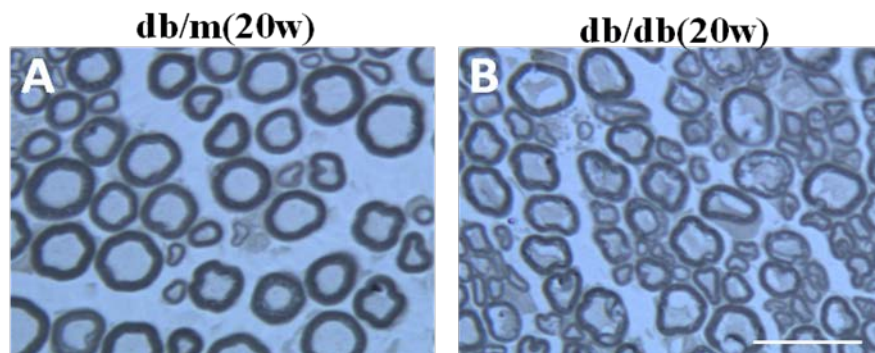

Supplement: DB161182SupplementaryData.pdf [file DB161182SupplementaryData.pdf]
